# Supplementary material
Source: Springer Nature journal article supplement (https://www.springermedizin.de/resource/supplementary/12885_2014_4733_MOESM5_ESM.pdf/9467134)

**A**

MDA-MB-231

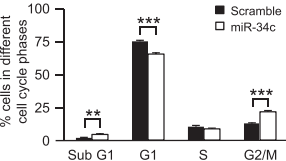**B**

MDA-MB-468

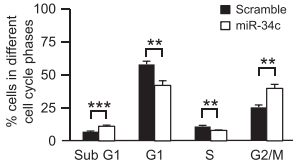**C**

BT-549

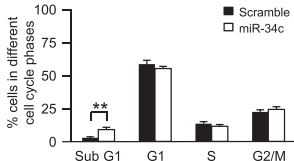

Supplement: MOESM5 [file 9467134]
